# Supplementary material for: The stress hyperglycemia ratio is associated with the development of cerebral edema and poor functional outcome in patients with acute cerebral infarction
Source: PubMed Central journal article supplement (PMC9474997; doi:10.3389/fnagi.2022.936862), 2022-09-01
Supplement: Presentation_1.pdf [file Presentation_1.pdf]

## *Supplementary Material*

### 1. Supplementary Figures and Tables

Supplementary Table 1. Baseline characteristics of patients included and excluded.

| Variables                                 | Included(n=638) | Excluded for missing<br>glucose, HbA1c or brain<br>imaging (n=1022) | <i>P</i> value |
|-------------------------------------------|-----------------|---------------------------------------------------------------------|----------------|
| Age(year), median (IQR)                   | 70(61-79)       | 70(59-79)                                                           | 0.69           |
| Male, n (%)                               | 378(59.2)       | 575(56.3)                                                           | 0.231          |
| Hypertension, n (%)                       | 367(57.5)       | 593(58.0)                                                           | 0.841          |
| Hyperlipidemia, n (%)                     | 46(7.2)         | 116(11.4)                                                           | 0.006          |
| Diabetes mellitus, n (%)                  | 159(24.9)       | 238(23.3)                                                           | 0.448          |
| Atrial fibrillation/Atrial flutter, n (%) | 219(34.3)       | 380(37.2)                                                           | 0.239          |
| Previous ischemic stroke/TIA, n (%)       | 63(9.9)         | 145(14.2)                                                           | 0.01           |
| Valvular heart disease, n (%)             | 59(9.2)         | 130(12.7)                                                           | 0.03           |
| Smoking, n (%)                            | 225(35.3)       | 351(34.3)                                                           | 0.701          |
| Alcohol consumption, n (%)                | 177(27.7)       | 272(26.6)                                                           | 0.615          |
| Baseline NIHSS, median (IQR)              | 10(3-15)        | 9(3-15)                                                             | 0.06           |

HbA1c, hemoglobin A1c; IQR. interquartile range; TIA. transient ischemic attack; NIHSS: National Institutes of Health Stroke Scale

Supplementary Table 2. Predictive factors for the development of moderate-to-severe CED on training dataset

| Variables                          | Univariate analysis OR<br>(95%CI) | <i>P</i> value | Multivariate<br>analysis OR<br>(95%CI), model 1 | <i>P</i> value | Multivariate<br>analysis OR<br>(95%CI), model 2 | <i>P</i> value |
|------------------------------------|-----------------------------------|----------------|-------------------------------------------------|----------------|-------------------------------------------------|----------------|
| Age                                | 1.01(0.99-1.03)                   | 0.274          | 1.00(0.98-1.03)                                 | 0.697          | 1.01(0.98-1.03)                                 | 0.653          |
| Male                               | 0.83(0.51-1.34)                   | 0.448          |                                                 |                |                                                 |                |
| Hypertension                       | 1.13(0.70-1.83)                   | 0.615          |                                                 |                |                                                 |                |
| Hyperlipidemia                     | 1.38(0.48-3.93)                   | 0.552          |                                                 |                |                                                 |                |
| Atrial fibrillation/Atrial flutter | 2.62(1.61-4.26)                   | <0.001         |                                                 |                |                                                 |                |
| Previous stroke/TIA                | 0.84(0.39-1.80)                   | 0.644          |                                                 |                |                                                 |                |
| Valvular heart disease             | 0.85(0.38-1.91)                   | 0.698          |                                                 |                |                                                 |                |
| Diabetes mellitus                  | 0.64(0.34-1.20)                   | 0.161          | 0.27(0.09-0.79)                                 | 0.016          | 0.44(0.17-1.19)                                 | 0.108          |
| Smoking                            | 0.79(0.47-1.34)                   | 0.381          |                                                 |                |                                                 |                |
| Alcohol consumption                | 0.68(0.33-1.39)                   | 0.29           |                                                 |                |                                                 |                |
| Onset to admission time            | 0.95(0.92-0.98)                   | 0.002          |                                                 |                |                                                 |                |
| Baseline NIHSS( $\geq 15$ )        | 4.32(2.62-7.13)                   | <0.001         | 1.93(1.05-3.57)                                 | 0.036          | 2.23(1.21-4.11)                                 | 0.01           |
| Occlusion site                     |                                   |                |                                                 |                |                                                 |                |
| No record or other                 | Reference                         |                | Reference                                       |                | Reference                                       |                |
| Carotid occlusion                  | 27.71(11.96-64.20)                | <0.001         | 18.44(7.28-46.70)                               | <0.001         | 16.45(6.57-41.20)                               | <0.001         |
| MCA occlusion (M1-M2)              | 9.65(4.32-21.54)                  | <0.001         | 8.47(3.44-20.87)                                | <0.001         | 7.89(3.24-19.23)                                | <0.001         |
| Endovascular treatment             | 2.10(1.18-3.73)                   | 0.012          | 0.43(0.20-0.92)                                 | 0.03           | 0.58(0.28-1.21)                                 | 0.149          |
| Intravenous thrombolysis           | 1.43(0.75-2.72)                   | 0.279          | 1.27(0.57-2.79)                                 | 0.559          | 1.33(0.61-2.89)                                 | 0.479          |
| Antihypertensive therapy           | 0.91(0.55-1.49)                   | 0.698          |                                                 |                |                                                 |                |
| Insulin                            | 1.24(0.63-2.43)                   | 0.536          |                                                 |                |                                                 |                |
| Oral hypoglycemic agents           | 0.62(0.28-1.38)                   | 0.242          |                                                 |                |                                                 |                |
| Antiplatelet                       | 0.37(0.20-0.70)                   | 0.002          |                                                 |                |                                                 |                |
| Statin                             | 0.78(0.41-1.51)                   | 0.462          |                                                 |                |                                                 |                |
| mTICI (2b/3)                       | 0.24(0.05-1.10)                   | 0.067          |                                                 |                |                                                 |                |
| RPG                                | 1.00(0.93-1.08)                   | 0.964          | 1.03(0.90-1.18)                                 | 0.633          | 1.04(0.92-1.18)                                 | 0.535          |
| SHR (per 0.1-point increases)      | 1.40(1.27-1.54)                   | <0.001         | 1.39(1.24-1.57)                                 | <0.001         |                                                 |                |
| SHR( $\geq 1.25$ )                 | 8.97(5.14-15.65)                  | <0.001         |                                                 |                | 6.87(3.46-13.63)                                | <0.001         |

OR, odds ratio; CI, confidence interval; TIA, transient ischemic attack; NIHSS, the National Institutes of Health Stroke Scale; MCA, middle cerebral artery; mTICI, modified Thrombolysis in Cerebral Infarction; RPG: random plasma glucose; SHR, stress hyperglycemia ratio

Supplementary Table 3. Predictive factors for the development of 90-day death on training dataset

| Variables                          | Univariate analysis |                | Multivariate analysis |                | Multivariate analysis |                |
|------------------------------------|---------------------|----------------|-----------------------|----------------|-----------------------|----------------|
|                                    | OR (95%CI)          | <i>P</i> value | OR (95%CI), model 1   | <i>P</i> value | OR (95%CI), model 2   | <i>P</i> value |
| Age                                | 1.04(1.02-1.07)     | 0.001          | 1.03(1.01-1.06)       | 0.018          | 1.03(1.00-1.05)       | 0.02           |
| Male                               | 1.15(0.67-1.96)     | 0.62           |                       |                |                       |                |
| Hypertension                       | 1.16(0.68-1.98)     | 0.585          |                       |                |                       |                |
| Hyperlipidemia                     | 1.94(0.67-5.65)     | 0.223          |                       |                |                       |                |
| Atrial fibrillation/Atrial flutter | 1.30(0.76-2.23)     | 0.337          |                       |                |                       |                |
| Previous ischemic stroke/TIA       | 1.33(0.63-2.83)     | 0.458          | 1.04(0.44-2.46)       | 0.92           | 1.08(0.46-1.53)       | 0.87           |
| Valvular heart disease             | 1.20(0.53-2.74)     | 0.658          |                       |                |                       |                |
| Smoking                            | 0.72(0.40-1.32)     | 0.291          |                       |                |                       |                |
| Alcohol consumption                | 0.78(0.35-1.75)     | 0.552          |                       |                |                       |                |
| Diabetes mellitus                  | 1.27(0.69-2.34)     | 0.449          | 0.85(0.37-1.99)       | 0.71           | 0.97(0.43-2.22)       | 0.95           |
| Onset to admission time            | 0.99(0.96-1.02)     | 0.387          |                       |                |                       |                |
| Baseline NIHSS                     | 1.09(1.05-1.13)     | <0.001         | 1.07(1.02-1.11)       | 0.0018         | 1.07(1.02-1.11)       | 0.0017         |
| TOAST classification               |                     |                |                       |                |                       |                |
| Large artery atherosclerosis       | 3.71(1.06-13.04)    | 0.041          |                       |                |                       |                |
| Cardio embolism                    | 4.71(1.37-16.23)    | 0.014          |                       |                |                       |                |
| Others                             | 3.57(0.97-13.07)    | 0.055          |                       |                |                       |                |
| Small-artery occlusion             | Reference           |                | Reference             |                | Reference             |                |
| Occlusion site                     |                     |                |                       |                |                       |                |
| Carotid occlusion                  | 3.61(1.89-6.90)     | <0.001         | 1.88(0.87-4.06)       | 0.11           | 1.71(0.78-3.77)       | 0.18           |
| MCA occlusion (M1-M2)              | 1.04(0.53-2.03)     | 0.908          | 0.62(0.27-1.40)       | 0.25           | 0.59(0.26-1.35)       | 0.21           |
| No record or other                 | Reference           |                | Reference             |                | Reference             |                |
| Endovascular treatment             | 1.36(0.70-2.63)     | 0.359          | 1.16(0.50-2.68)       | 0.73           | 1.27(0.55-2.91)       | 0.57           |
| Intravenous thrombolysis           | 0.56(0.23-1.36)     | 0.196          | 0.53(0.21-1.36)       | 0.19           | 0.53(0.20-1.36)       | 0.18           |
| Antihypertensive therapy           | 0.82(0.47-1.43)     | 0.475          |                       |                |                       |                |
| Insulin                            | 1.45(0.70-3.00)     | 0.321          |                       |                |                       |                |
| Oral hypoglycemic agents           | 0.87(0.39-1.94)     | 0.731          |                       |                |                       |                |
| Antiplatelet                       | 0.32(0.16-0.63)     | 0.001          |                       |                |                       |                |
| Statin                             | 0.48(0.25-0.94)     | 0.032          |                       |                |                       |                |
| mTICI (2b/3)                       | 0.77(0.14-4.28)     | 0.761          |                       |                |                       |                |
| RPG                                | 1.04(0.96-1.12)     | 0.314          | 1.04(0.93-1.16)       | 0.45           | 1.04(0.93-1.16)       | 0.47           |
| SHR(per 0.1-point increases)       | 1.21(1.11-1.31)     | <0.001         | 1.13(1.03-1.25)       | 0.01           |                       |                |

| Variables           | Univariate analysis<br>OR (95%CI) | <i>P</i> value | Multivariate analysis<br>OR (95%CI), model 1 | <i>P</i> value | Multivariate analysis<br>OR (95%CI), model 2 | <i>P</i> value |
|---------------------|-----------------------------------|----------------|----------------------------------------------|----------------|----------------------------------------------|----------------|
| SHR ( $\geq 1.25$ ) | 4.64(2.59-8.31)                   | <0.001         |                                              |                | 2.79(1.42-5.49)                              | 0.003          |

OR, odds ratio; CI, confidence interval; TIA, transient ischemic attack; NIHSS, the National Institutes of Health Stroke Scale; TOAST, Trial of Org 10172 in Acute Stroke Treatment; MCA, middle cerebral artery; mTICI, modified Thrombolysis in Cerebral Infarction; RPG: random plasma glucose; SHR, stress hyperglycemia ratio

Supplementary Table 4. Predictive performance of dichotomized SHR ( $\geq 1.25$  versus  $< 1.25$ ) on training dataset and validation dataset

|                    | moderate-to-severe<br>CED | 90-day poor functional<br>outcome (mRS $>2$ ) | 90-day death |
|--------------------|---------------------------|-----------------------------------------------|--------------|
| Training dataset   |                           |                                               |              |
| Sensitivity (%)    | 50.59                     | 29.21                                         | 42.42        |
| Specificity (%)    | 89.75                     | 92.97                                         | 86.29        |
| PPV (%)            | 56.58                     | 81.94                                         | 38.89        |
| NPV (%)            | 87.31                     | 54.6                                          | 87.94        |
| Accuracy (%)       | 81.57                     | 59.69                                         | 78.81        |
| Validation dataset |                           |                                               |              |
| Sensitivity (%)    | 49.09                     | 41.41                                         | 44.44        |
| Specificity (%)    | 76.70                     | 82.88                                         | 73.77        |
| PPV (%)            | 39.71                     | 68.33                                         | 20           |
| NPV (%)            | 82.82                     | 61.33                                         | 90           |
| Accuracy (%)       | 70.13                     | 63.33                                         | 70           |

CED: Cerebral edema; PPV: Positive Predictive Value; NPV: Negative Predictive Value

## 1.1 Supplementary Figure

Supplementary Figure 1. Association between the stress hyperglycemia ratio (SHR) and moderate-to-severe cerebral edema (training dataset).

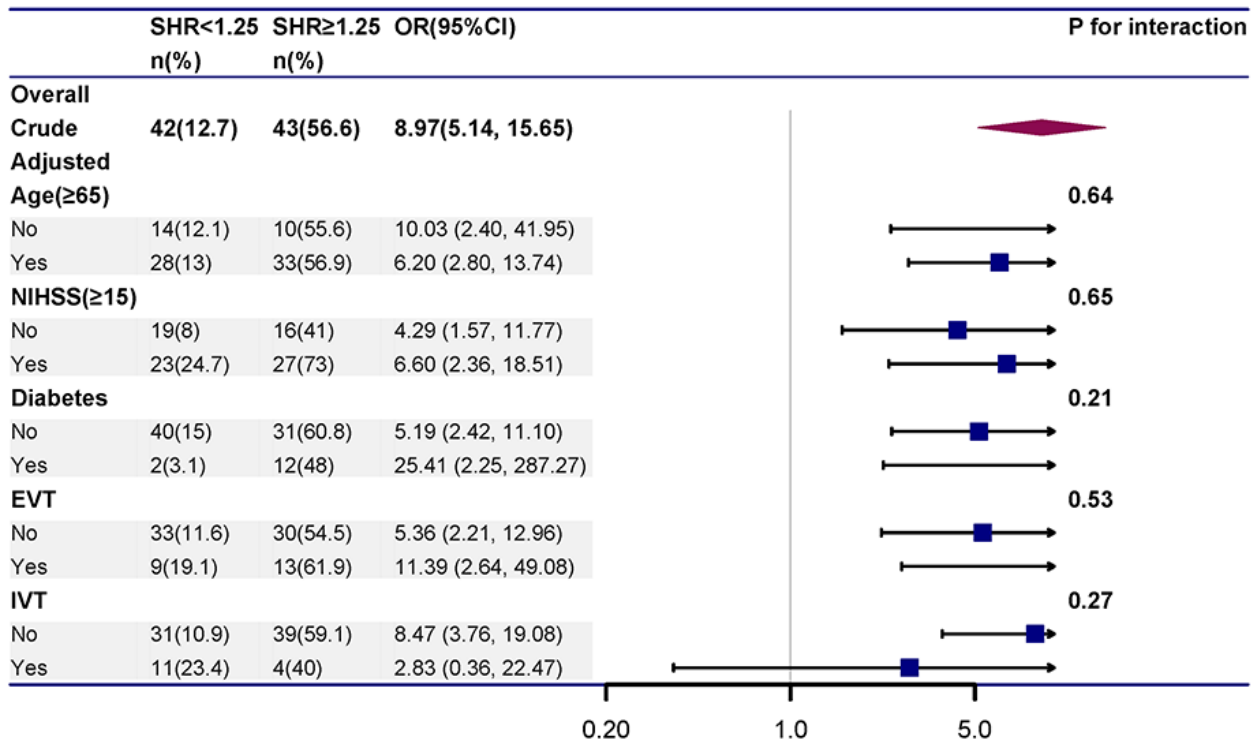

The following covariates were adjusted for the stratified variables as in model 2 (Supplementary table 2): age, the National Institutes of Health Stroke Scale (NIHSS) score, diabetes, endovascular treatment, intravenous thrombolysis, occlusion site, and admission plasma glucose. SHR: stress hyperglycemia ratio, OR: odds ratio, CI, confidence interval; EVT: endovascular treatment, IVT: intravenous thrombolysis

Supplementary Figure 2. Association between the stress hyperglycemia ratio (SHR) and 90-day poor functional outcome (training dataset)

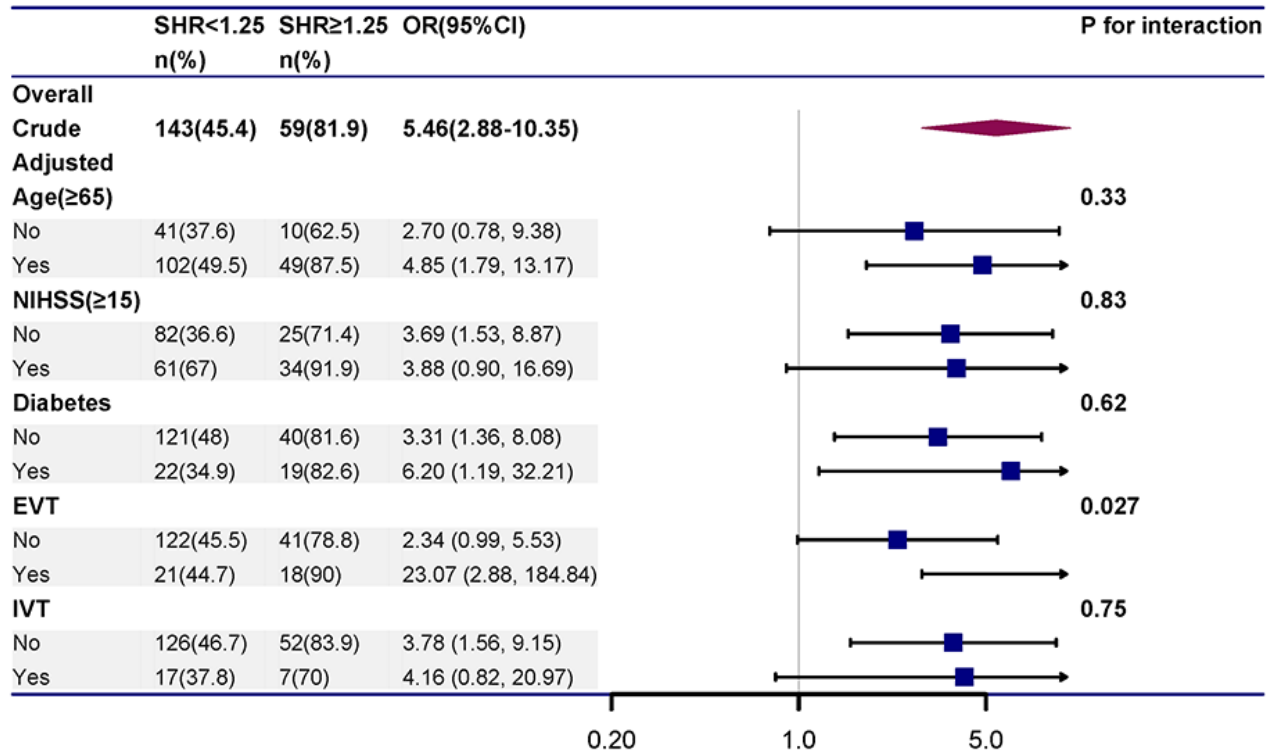

The following covariates were adjusted for the stratified variables as in model 2 (table 3): age, the National Institutes of Health Stroke Scale (NIHSS) score, diabetes, endovascular treatment, intravenous thrombolysis, occlusion site, previous stroke/transient ischemic attack, and admission plasma glucose. SHR: stress hyperglycemia ratio, OR: odds ratio, CI, confidence interval; EVT: endovascular treatment, IVT: intravenous thrombolysis

Supplementary Figure 3. Association between stress hyperglycemia ratio (SHR) and 90-day death (training dataset)

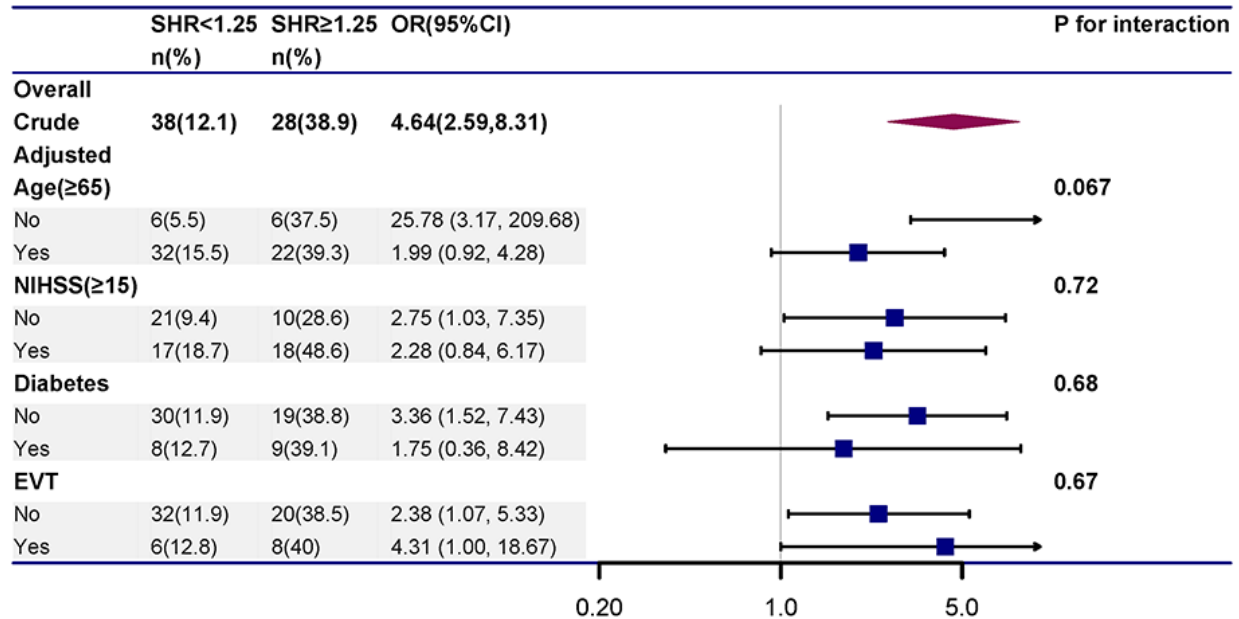

The following covariates were adjusted for the stratified variables as in model 2 (Supplementary table 3): age, the National Institutes of Health Stroke Scale (NIHSS) score, diabetes, endovascular treatment, intravenous thrombolysis, occlusion site, previous stroke/transient ischemic attack, and admission plasma glucose. SHR: stress hyperglycemia ratio, OR: odds ratio, CI, confidence interval; EVT: endovascular treatment
